# Supplementary material for: A milk-derived pentapeptide reduces blood pressure in advanced hypertension in a CCK system-dependent manner
Source: Royal Society of Chemistry journal article supplement (doi:10.1039/d0fo01122c), 2020-01-01
Supplement: d0fo01122c1.pdf [file d0fo01122c1.pdf]

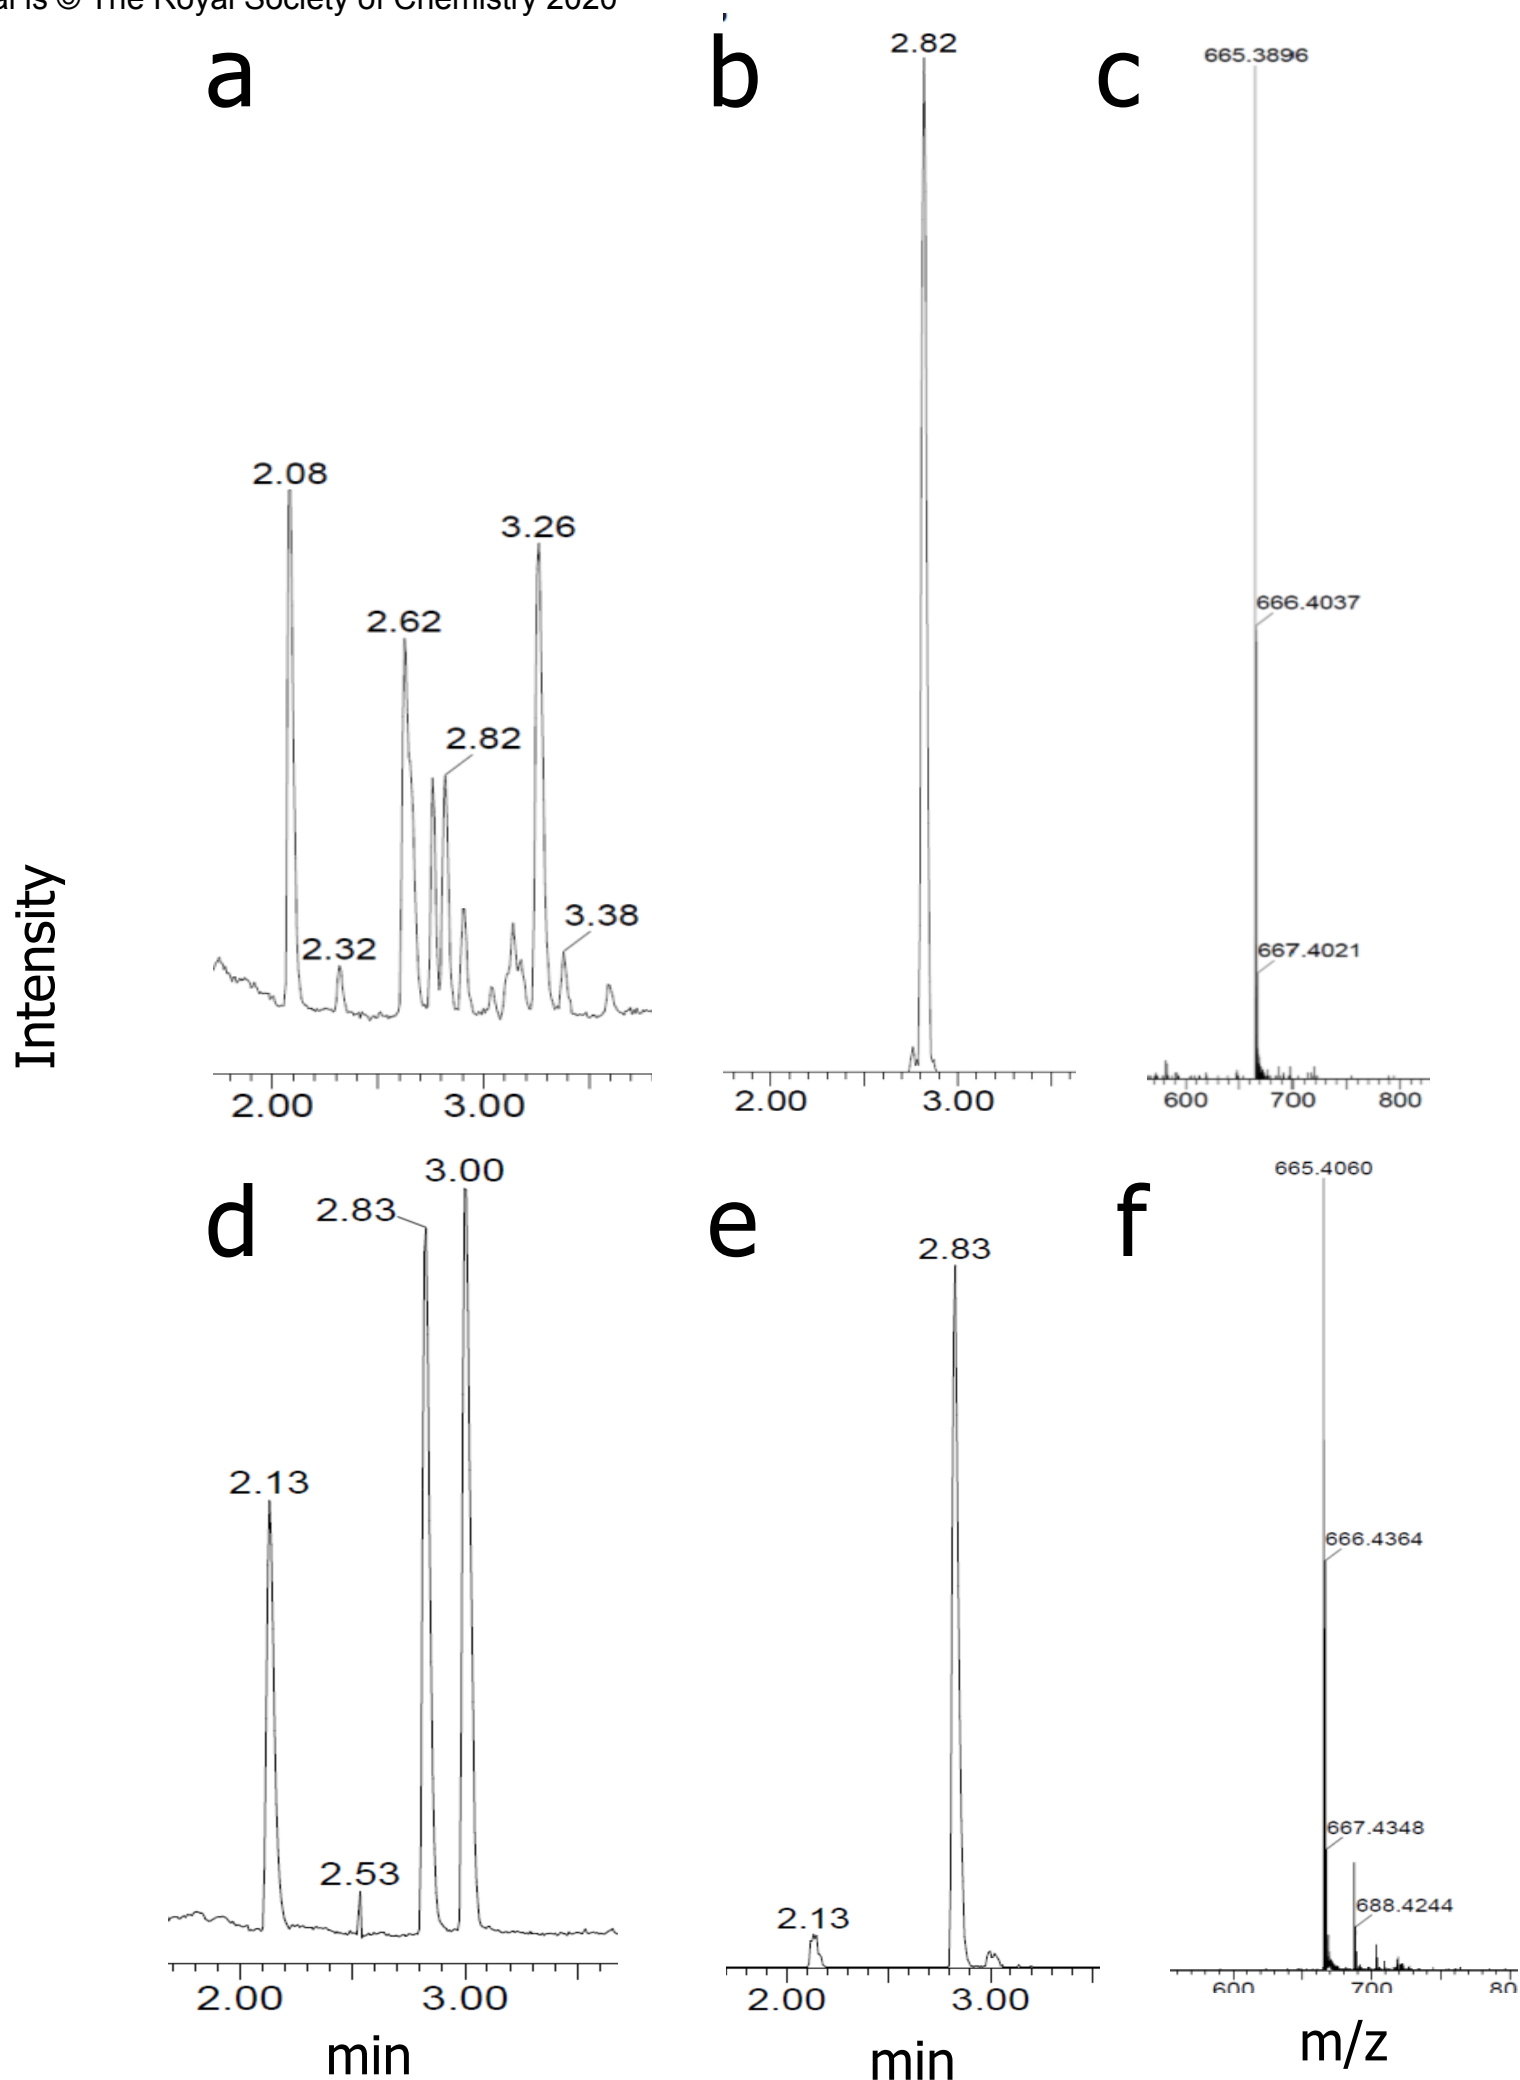

**Supplemental Fig. 1.** LCMS charts of digested (a-c) and standard FW-related peptides (d-f). The subtilisin digests of the model peptide BSA(152-167), and mixture of KFWGK, FWGK, and FW were analyzed by the LCMS system. TIC (a and d), intensity of selected MS (MS: 665.4; b and e), and MS spectrum (RT: 2.8 min; c and f).
